# Supplementary material for: Habitual Short Sleep Duration, Diet, and Development of Type 2 Diabetes in Adults
Source: PubMed Central journal article supplement (PMC10915681; doi:10.1001/jamanetworkopen.2024.1147), 2024-03-05
Supplement: jamanetwopen-e241147-s002.pdf [file jamanetwopen-e241147-s002.pdf]

## Data Sharing Statement

Nôga. Habitual Short Sleep Duration, Diet, and Development of Type 2 Diabetes in Adults. *JAMA Netw Open*. Published March 05, 2024. doi:10.1001/jamanetworkopen.2024.1147

### Data

**Data available:** No

### Additional Information

**Explanation for why data not available:** The data can be accessed upon approval from the UK Biobank.
